# Supplementary material
Source: Springer Nature journal article supplement (https://www.springermedizin.de/resource/supplementary/12885_2008_1569_MOESM5_ESM.pdf/9472344)

**A**

F-actin, 3h

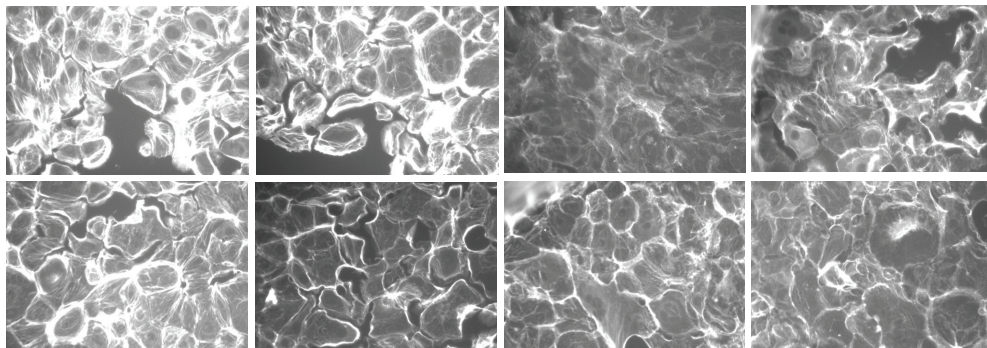

Vimentin, 72h

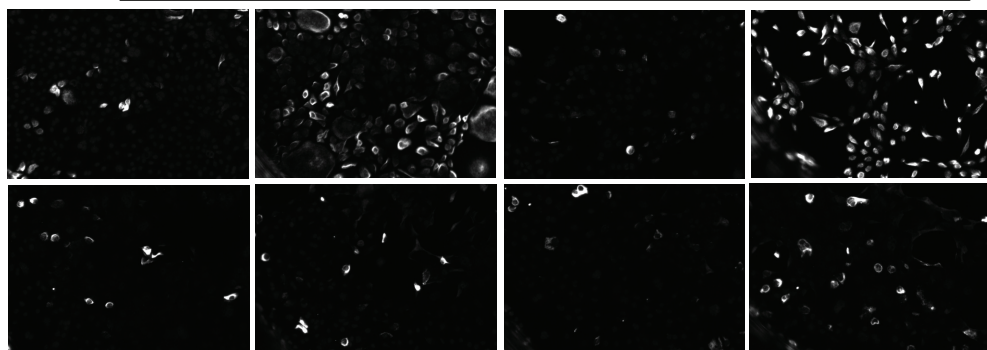**B**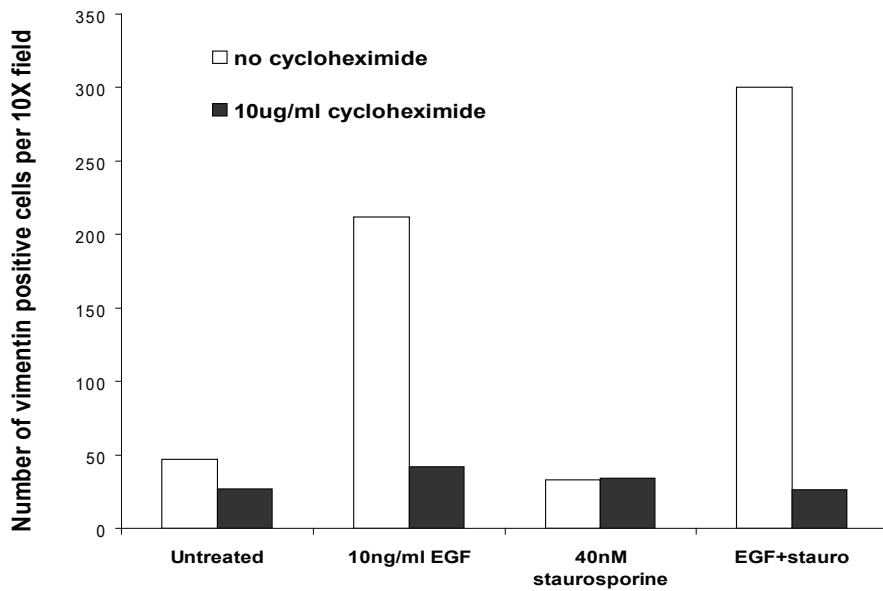

Supplement: MOESM5 [file 9472344]
